# Supplementary material
Source: PubMed Central journal article supplement (PMC4456627)
Supplement: cr201560x1.pdf [file cr201560x1.pdf]

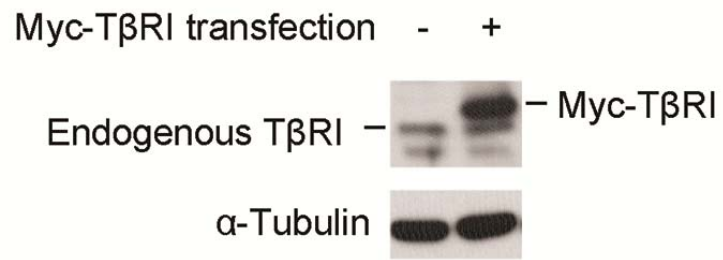

**Supplementary information, Figure S1** Myc-T $\beta$ RI protein expression in HeLa cells. HeLa cells were transfected with the Myc-T $\beta$ RI plasmid and harvested for anti-T $\beta$ RI immunoblotting. Tubulin served as a loading control.
