# Supplementary material
Source: PubMed Central journal article supplement (PMC4456627)
Supplement: cr201560x3.pdf [file cr201560x3.pdf]

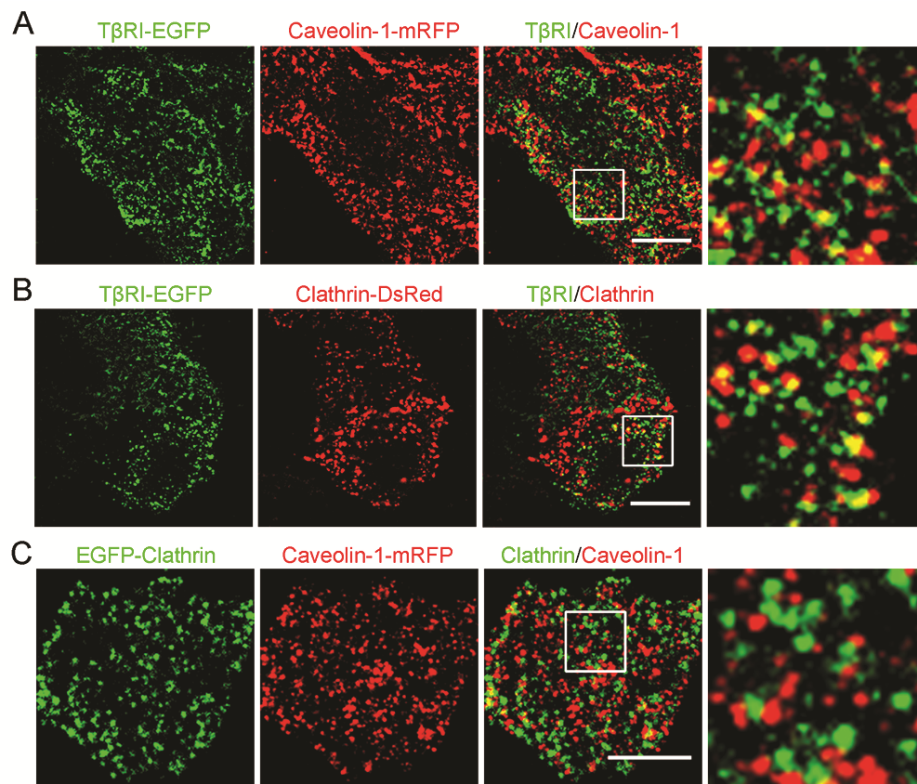

**Supplementary information, Figure S3** Distribution of TβRI, caveolin-1 and clathrin at the plasma membrane. Dual-color TIRFM images of HeLa cells co-expressing TβRI-EGFP and caveolin-1-mRFP (A), TβRI-EGFP and clathrin-DsRed (B), EGFP-clathrin and caveolin-1-mRFP (C). The regions outlined in the overview were magnified at the right of each panel. Partial colocalization (yellow spots) was observed between TβRI-EGFP and caveolin-1-mRFP, TβRI-EGFP and clathrin-DsRed at the plasma membrane. EGFP-clathrin and caveolin-1-mRFP showed no obvious colocalization at the plasma membrane. Scale bar, 10 μm.
