# Supplementary material
Source: PubMed Central journal article supplement (PMC4456627)
Supplement: cr201560x4.pdf [file cr201560x4.pdf]

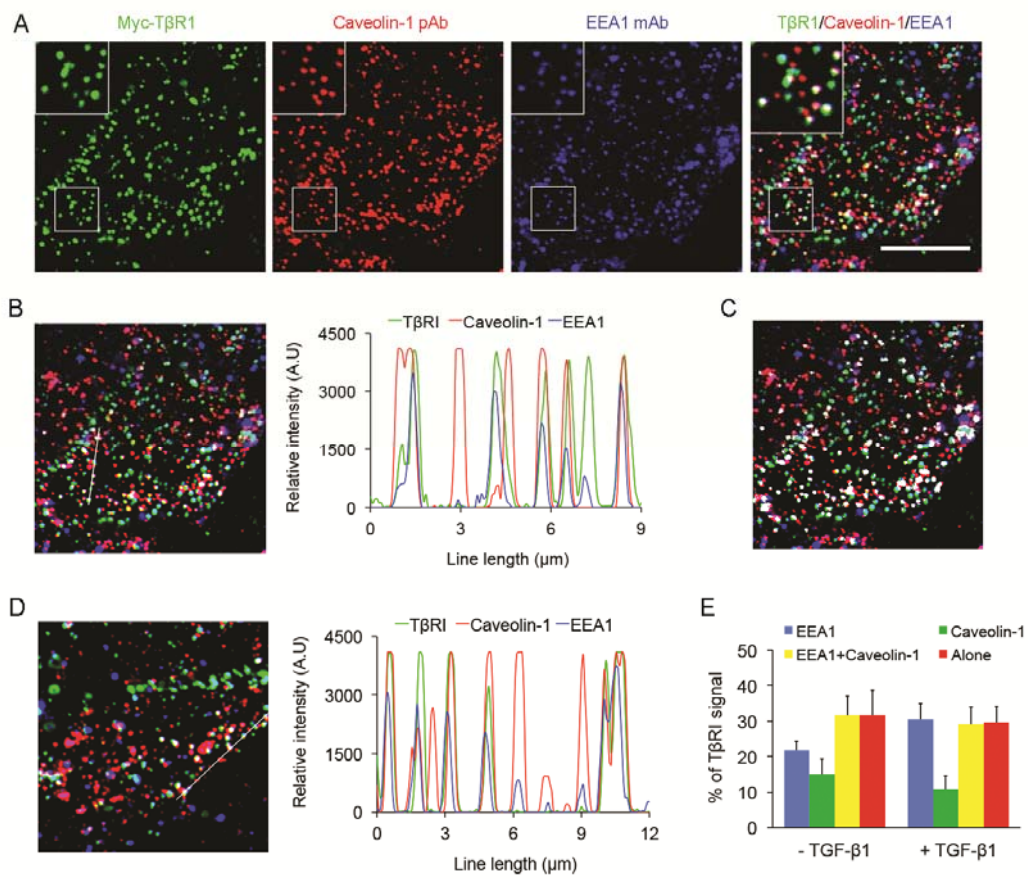

**Supplementary information, Figure S4** Quantification of the triple colocalization of T $\beta$ RI, caveolin-1 and EEA1. **(A)** HeLa cells expressing Myc-T $\beta$ RI were labeled and internalized for 30 min in the presence of TGF- $\beta$ 1. Then the cells were immunostained with antibodies against caveolin-1 and EEA1 and imaged by confocal microscopy. **(B)** The fluorescence intensities of the three channels along the white line of the merged image were shown. **(C)** The triple colocalization (white signal) was identified by the Blobprob plugin (ImageJ). The Mander's overlay coefficients were calculated basing on the triple colocalization identified. **(D)** The fluorescence intensities of the three channels along the white line on the merged image (**Figure 2B**) were shown. **(E)** Quantifying the distribution of Myc-T $\beta$ RI in EEA1-positive vesicles (EEA1), caveolin-1-positive vesicles (Caveolin-1), EEA1 and caveolin-1 double-positive vesicles (EEA1+Caveolin-1), EEA1 and caveolin-1 double-negative vesicles (Alone) after 30 min internalization in the absence or presence of TGF- $\beta$ 1 by visual inspection as described in Methods (n = 4 independent experiments).
