# Supplementary material
Source: PubMed Central journal article supplement (PMC4456627)
Supplement: cr201560x5.pdf [file cr201560x5.pdf]

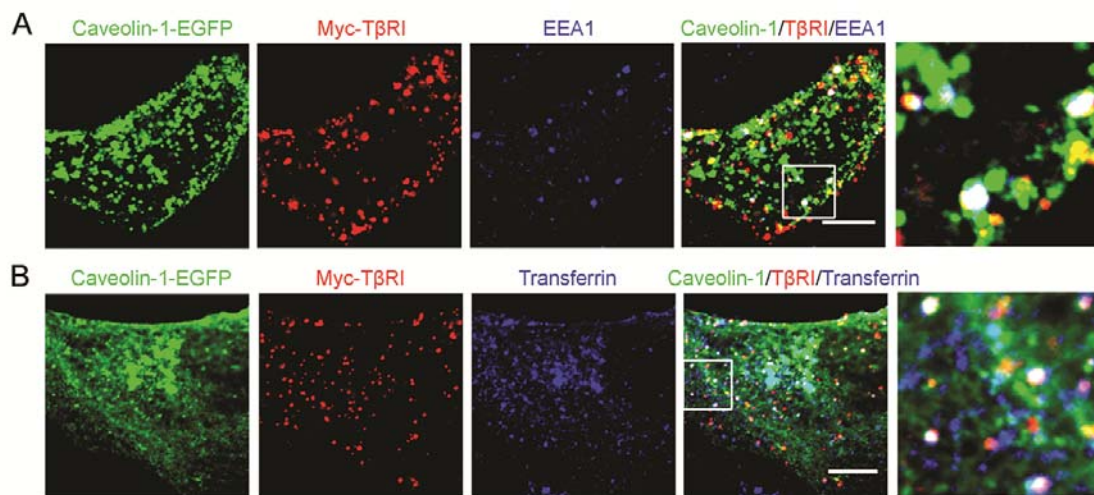

**Supplementary information, Figure S5** Distribution of T $\beta$ RI in caveolin-1-positive early endosomes in the mink lung epithelial cells (Mv1Lu). **(A)** Mv1Lu cells co-expressing caveolin-1-EGFP and Myc-T $\beta$ RI were immunostained with antibody against EEA1. Myc-T $\beta$ RI were labeled at 4 °C and internalized at 37 °C for 30 min in the presence of TGF- $\beta$ 1. **(B)** Mv1Lu cells were co-transfected with caveolin-1-EGFP and Myc-T $\beta$ RI. Myc-T $\beta$ RI were labeled and then internalized together with Alexa Fluor 633-conjugated transferrin for 30 min at 37 °C in the presence of TGF- $\beta$ 1. Scale bar, 10  $\mu$ m.
