# Supplementary material
Source: PubMed Central journal article supplement (PMC4456627)
Supplement: cr201560x6.pdf [file cr201560x6.pdf]

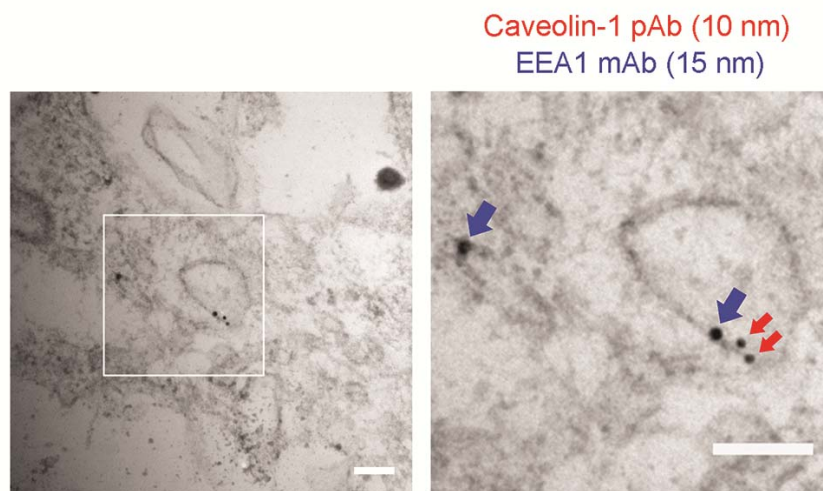

**Supplementary information, Figure S6** Resolving the ultrastructure of caveolin-1-positive early endosomes by immunoelectron microscopy. In the ultrathin sections of the cells, caveolin-1 and EEA1 were labeled by the 10 nm and 15 nm gold respectively and imaged by electron microscopy. The right panel shows the enlarged view of the boxed region. The quantification of the colocalization between the 10 nm gold-labeled caveolin-1 and the 15 nm gold-labeled EEA1 is not available due to the technical difficulty of getting a high level of double immunogold labeling without the high nonspecific binding. Scale bar, 100 nm.
