# Supplementary material
Source: PubMed Central journal article supplement (PMC4456627)
Supplement: cr201560x7.pdf [file cr201560x7.pdf]

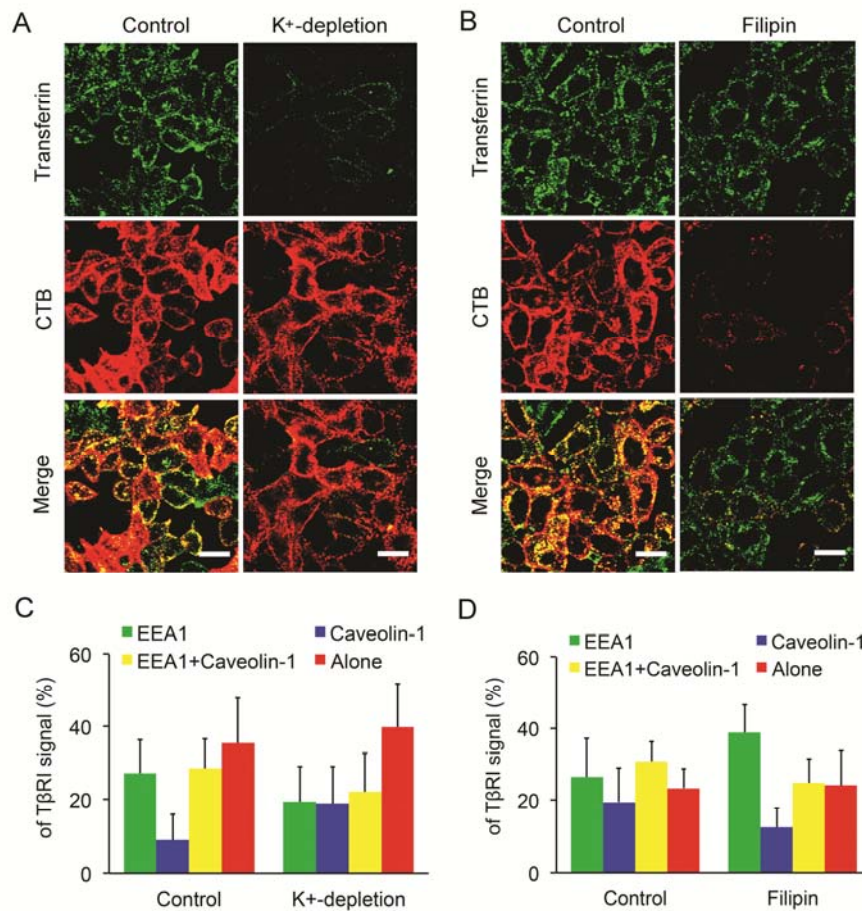

**Supplementary information, Figure S7** Interfering of clathrin- and caveolae-mediated endocytosis. To confirm the effect of K<sup>+</sup>-depletion on inhibiting clathrin-mediated endocytosis, the cells were pre-treated in the control or K<sup>+</sup>-depletion medium at 37 °C for 1 h (A). To confirm the effect of filipin on blocking caveolae-mediated endocytosis, the cells were pre-treated with filipin (1 μg/ml) at 37 °C for 1 h (B). Then the cells were incubated with Alexa Fluor 488-conjugated transferrin and Alexa Fluor 555-conjugated Cholera Toxin Subunit B (CTB) at 37 °C for 15 min. After wash, the cells were imaged by confocal microscopy. Scale bar, 10 μm. (C, D) After the cells were pretreated with K<sup>+</sup>-depletion medium or filipin, the distribution of Myc-TβR1 (internalized for 30 min in the presence of TGF-β1) in the four intracellular compartments was quantified (n = 8-12 cells/condition).
