# Supplementary material
Source: PubMed Central journal article supplement (PMC4456627)
Supplement: cr201560x8.pdf [file cr201560x8.pdf]

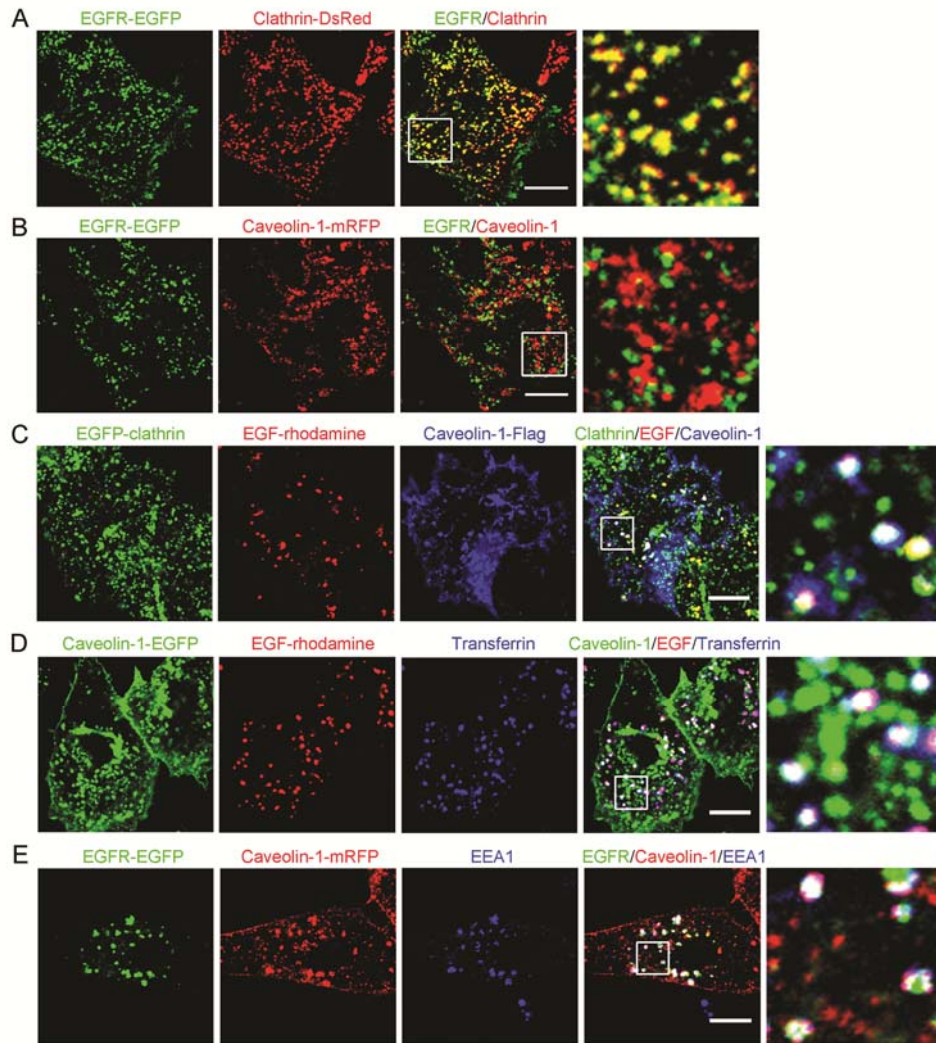

**Supplementary information, Figure S8** Intracellular distribution of EGFR in caveolin-1-positive early endosomes. **(A, B)** HeLa cells co-expressing EGFR-EGFP and clathrin-DsRed **(A)**, EGFR-EGFP and caveolin-1-mRFP **(B)** were stimulated with EGF for 15 min and then imaged by dual-color TIRFM. **(C)** HeLa cells co-expressing EGFP-clathrin and caveolin-1-Flag were incubated with EGF-rhodamine at 4 °C for 1 h. Then the cells were incubated at 37 °C for 15 min to allow EGF-rhodamine internalization. Caveolin-1-Flag was immunostained with antibody against Flag. **(D)** HeLa cells expressing caveolin-1-EGFP were incubated with EGF-rhodamine and Alexa Fluor 633-conjugated transferrin at 4 °C for 1 h. Then the cells were incubated at 37 °C for 15 min. **(E)** HeLa cells co-expressing EGFR-EGFP and caveolin-1-mRFP were stimulated with EGF (100 ng/ml) for 15 min. Then the cells were immunostained with antibody against EEA1. The cells in **(C-E)** were imaged by confocal microscopy. Scale bar, 10  $\mu$ m.
