# Supplementary material
Source: PubMed Central journal article supplement (PMC4456627)
Supplement: cr201560x9.pdf [file cr201560x9.pdf]

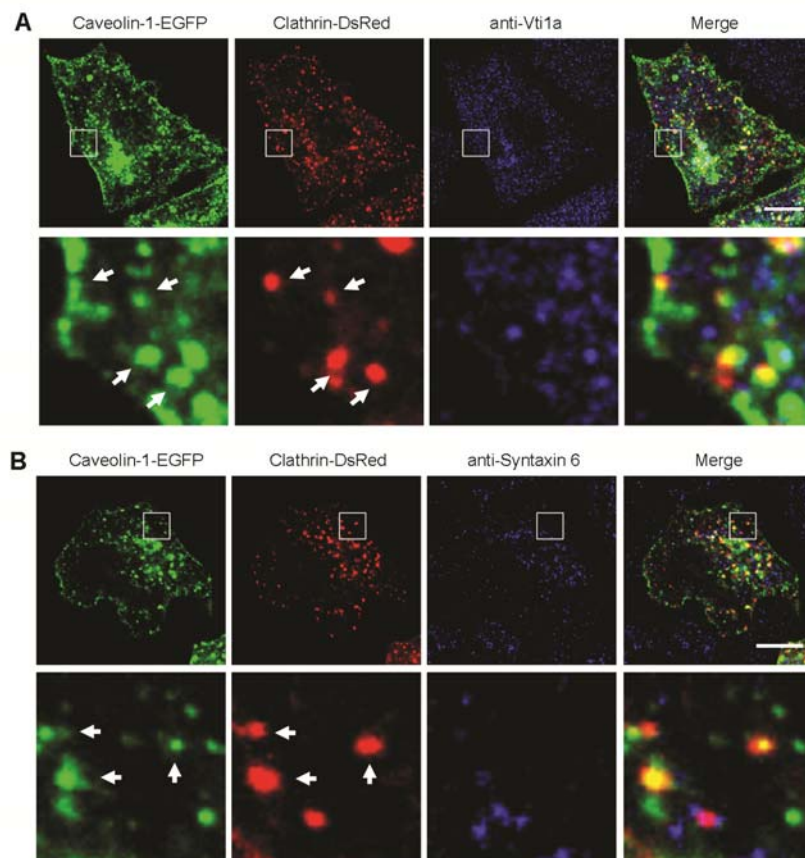

**Supplementary information, Figure S9** The caveolin-1 and clathrin double-positive vesicles were negatively stained with the endosomal SNARE molecules. HeLa cells co-expressing EGFR-EGFP and clathrin-DsRed were immunostained with antibodies against SNARE Vti1a (**A**) or syntaxin 6 (**B**) and imaged by confocal microscopy. The lower panels show the enlarged view of the boxed regions. The caveolin-1 and clathrin double-positive but Vti1a or syntaxin 6 negative vesicles were marked by arrows. Scale bar, 10  $\mu\text{m}$ .
