# Supplementary material
Source: PubMed Central journal article supplement (PMC4456627)
Supplement: cr201560x10.pdf [file cr201560x10.pdf]

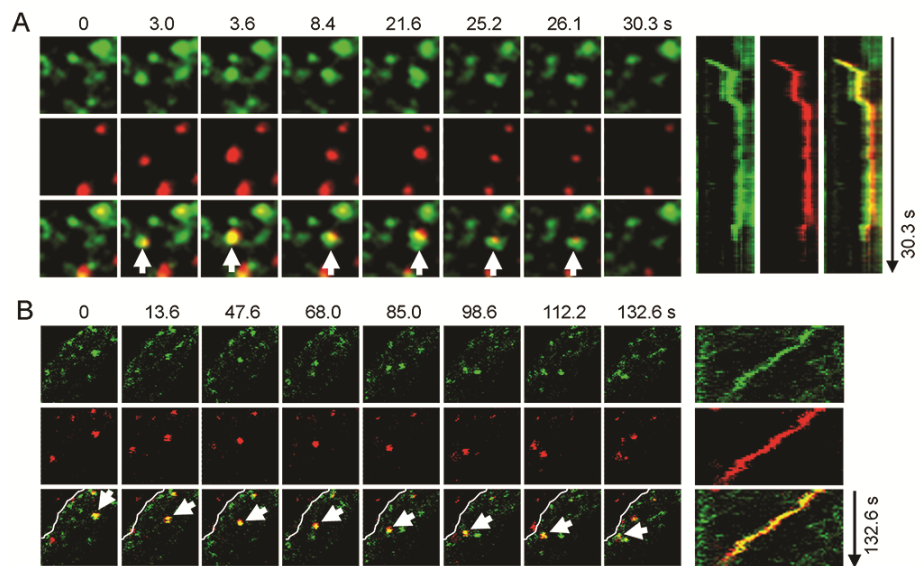

**Supplementary information, Figure S10** Caveolin-1 is involved in TβRI recycling. **(A)** Live-cell TIRFM imaging showed the sudden show up and then disappearance of a caveolin-1-EGFP (green) and Myc-TβRI (red) double-positive vesicle (arrows) at the plasma membrane. The corresponding kymographs of the two molecules were shown. **(B)** Live-cell spinning-disk confocal imaging showed the movement of a caveolin-EGFP (green) and Myc-TβRI (red) double-positive vesicle (arrows) toward the plasma membrane (white lines). The corresponding kymographs of the two molecules were shown.
