# Supplementary material
Source: PubMed Central journal article supplement (PMC4456627)
Supplement: cr201560x11.pdf [file cr201560x11.pdf]

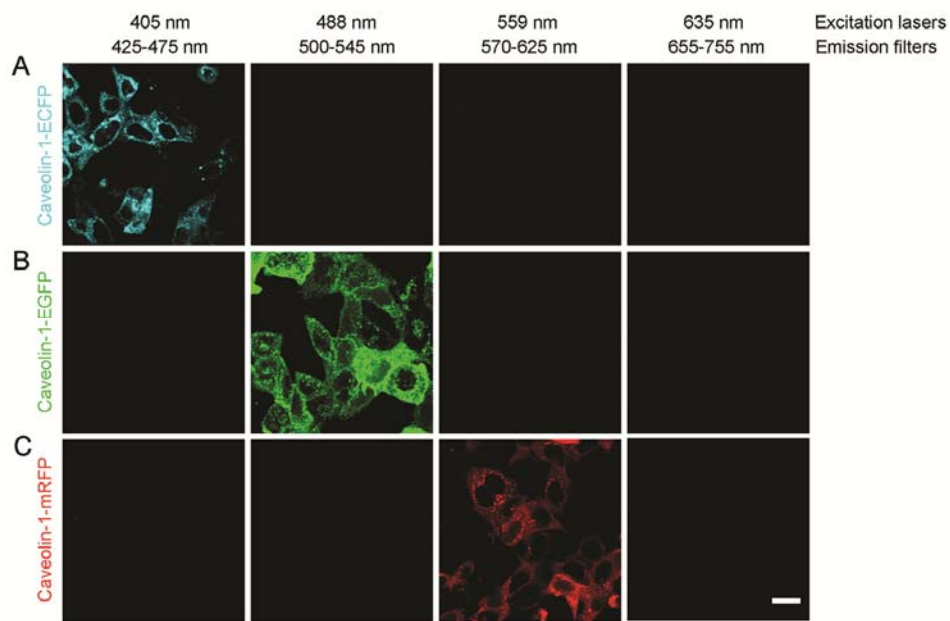

**Supplementary information, Figure S11** Test for fluorescence bleed-through between different channels by single-labeled specimens. HeLa cells were transfected with caveolin-1-CFP (**A**), caveolin-1-GFP (**B**), or caveolin-1-mRFP (**C**) and imaged by the Olympus FluoView FV1000-IX81 confocal microscope. For the four color imaging, the lasers and the corresponding emission filters for each channel used were shown at the top of the images. The fluorescence bleed-through between different channels is negligible under our experiment condition. Scale bar, 20  $\mu\text{m}$ .
